# Supplementary material
Source: MDPI journal article supplement (https://www.mdpi.com/2673-4168/2/4/33)
Supplement: s1 [file s1]

## **SUPPLEMENTARY MATERIAL**

### **‘Pera’ Orange and ‘Moro’ Blood Orange Juice Improves Oxidative Stress and Inflammatory Response Biomarkers and Modulates the Gut Microbiota of Individuals with Insulin Resistance and Different Obesity Classes**

Aline Alves de Santana<sup>1\*</sup>, Eric de Castro Tobaruela<sup>1‡</sup>, Karina Gama dos Santos<sup>1</sup>, Luiz Gustavo Sparvoli<sup>2</sup>, Cristiane Kovacs do Amaral<sup>3</sup>, Daniel Magnoni<sup>3</sup>, Carla R. Taddei<sup>2</sup>, Ronaldo Vagner Thomatieli dos Santos<sup>4</sup>, Neuza Mariko Aymoto Hassimotto<sup>1</sup>, and Franco Maria Lajolo<sup>1</sup>

<sup>1</sup>Department of Food and Experimental Nutrition, School of Pharmaceutical Sciences, University of São Paulo (USP), São Paulo, SP, Brazil; Food Research Center (FoRC), São Paulo, SP, Brazil

<sup>2</sup>Department of Clinical and Toxicological Analysis, School of Pharmaceutical Sciences, USP, São Paulo, Brazil

<sup>3</sup>Dante Pazzanese Institute of Cardiology, São Paulo, SP, Brazil.

<sup>4</sup>Department of Bioscience, Federal University of São Paulo, São Paulo, Brazil.

‡Corresponding author: Eric de Castro Tobaruela, [erictobaruela@usp.br](mailto:erictobaruela@usp.br)

\*These authors have contributed equally to this work.

## Material and Methods

### *Quantification of Soluble Sugar, Organic Acids, and Chemical Composition*

The soluble sugars were analyzed by high performance liquid chromatography (HPLC) coupled to a pulse amperometric detector according to Shiga *et al.* (2011). The organic acid contents were analyzed by HPLC in a HP1100 system (Hewlett-Packard Company, Palo Alto, CA, USA) coupled with a diode-array detector, equipped with a  $\mu$ Bondpack C18 (300 mm  $\times$  3.6 mm i.d., Waters, Milford, MA, USA) and elution (flow rate of 0.5 mL  $\cdot$  min<sup>-1</sup>) was carried out in isocratic conditions with 0.1% H<sub>3</sub>PO<sub>4</sub>, monitored at 210 nm. The content of total dietary fiber and fractions were measured according to the method described by Association of Official Analytical Chemists (AOAC 991.43) (AOAC, 1995).

### *Analysis of Total Phenolic Content*

The total phenolic content of samples was determined using the Folin–Ciocalteu colorimetric method described by Singleton and Rossi (1965) with some modifications. A previously shaken sample of orange juice (2 mL) was added to 10 mL of methanol/water (80:20, v/v). The sample was vortexed for 1 min and then placed in an ultrasonic bath (15 min) according to the procedure described by Stella *et al.* (2011). Afterward, the samples were centrifuged at 10000  $\times g$  during 15 min at 20 °C, and supernatants were filtered by a Whatman filter and analyzed. The absorbance was measured spectrophotometrically at 763 nm. Measurements were recorded on an UV–vis spectrophotometer Helios Epsilon (Thermo Scientific, Madison, WI, USA). The results were expressed as milligrams of gallic acid per 100 mL of orange juice.

### *Quantification of Flavonoids in Orange Juice*

Orange juices (10 mL) were centrifuged at  $10,000 \times g$  for 15 min at 4 °C. The supernatant was eluted in a column of 1 g of polyamide (CC 6, Macherey–Nagel), previously preconditioned by passing methanol followed by deionized water. The phenolic compounds were eluted with methanol acidified with 2.5% acetic acid. The eluates were completely dried by rotary evaporation (Rotavapor, RE 120, Büchi, Flawil, Switzerland) under a vacuum at 40 °C, resuspended with methanol acidified with 5% acetic acid, and filtered through a 0.45 µm PVDF Millex filter (Millipore Ltd.a., Bedford, MA, USA) before HPLC analysis. The pellet was added to 20 mL of dimethyl sulfoxide, homogenized overnight at room temperature, centrifuged, and filtered through a 0.45 µm PVDF filter.

Samples were analyzed by HPLC on Agilent 2100 equipment coupled to a diode array detector (DAD) using a Prodigy 5 µm ODS3 column (250 × 4.60 mm) (Phenomenex Ltd., Cheshire, UK) with a flow rate of  $1 \text{ mL} \cdot \text{min}^{-1}$  at 25 °C. Elution was carried out with a solvent gradient constituted of 0.5% formic acid in water (A) and 0.5% formic acid in acetonitrile (B). The solvent concentration gradient applied was 8% B at the beginning, 10% for 5 min, 17% for 10 min, 25% for 15 min, 50% for 25 min, 90% for 30 min, 50% for 32, and 8% for 35 min. The eluates were monitored at 280 and 525 nm (Brasili *et al.*, 2017). Quantification was performed using a calibration curve of cyanidin-3-O-glucoside (at 525 nm) and hesperidin, narirutin, and didymin at 280 nm.

Peak identification was carried out by Prominence liquid chromatography (Shimadzu, Japan) coupled to an ion trap mass spectrometer (Esquire HCT model, Bruker Daltonics, Billerica, MA, USA). The separation conditions were the same as those used for HPLC/DAD, and the flow rate was changed to 0.2

mL·min<sup>-1</sup> to allow the eluate to pass through the mass spectrometer. The ESI was maintained in positive and negative modes for anthocyanins and other flavonoid classes, respectively. The mass operating conditions were programmed to perform a full scan (m/z 100–1000), with a collision energy of 3000–3500 V, and a capillary temperature of 275 °C. Peak identification was carried out by the combined information provided by mass spectra, retention time, and literature data (Hillebrand *et al.*, 2004). The identity was confirmed by co-elution with authentic standards.

## References

- Association of Official Analytical Chemists (AOAC). Official Methods of Analysis, 16th ed.; AOAC International: Arlington, VA, USA, 1995.
- Brasili, E.; Chaves, D. F.; Xavier, A. A.; Mercadante, A. Z.; Hassimotto, N. M. A.; Lajolo, F. M. Effect of Pasteurization on Flavonoids and Carotenoids in Citrus sinensis (L.) Osbeck cv. 'Cara Cara' and 'Bahia' Juices. *J. Agric. Food Chem.* **2017**, *65*(7), 1371–1377.
- Hillebrand, S.; Schwarz, M.; Winterhalter, P. Characterization of Anthocyanins and Pyranoanthocyanins from Blood Orange [Citrus sinensis (L.) Osbeck] Juice. *J. Agric. Food Chem.* **2004**, *52*(24), 7331–7338.
- Shiga, T.; Soares, C. A.; Nascimento, J. R. O.; Purgatto, E.; Lajolo, F. M.; Cordenunsi, B. R. Ripening-associated changes in the amounts of starch and non-starch polysaccharides and their contributions to fruit softening in three banana cultivars. *J. Sci. Food Agric.* **2011**, *91*(8), 1511–1516.
- Singleton, V. L.; Rossi, J. A. Colorimetry of total phenolics with phosphomolybdic-phosphotungstic acid reagents. *Am. J. Enol. Vitic.* **1965**, *16*, 144–158.
- Stella, S. P.; Ferrarezi, A. C.; Santos, K. O.; Monteiro, M. Antioxidant activity of commercial ready-to-drink orange juice and nectar. *J. Food Sci.* **2011**, *76*, 392–397.

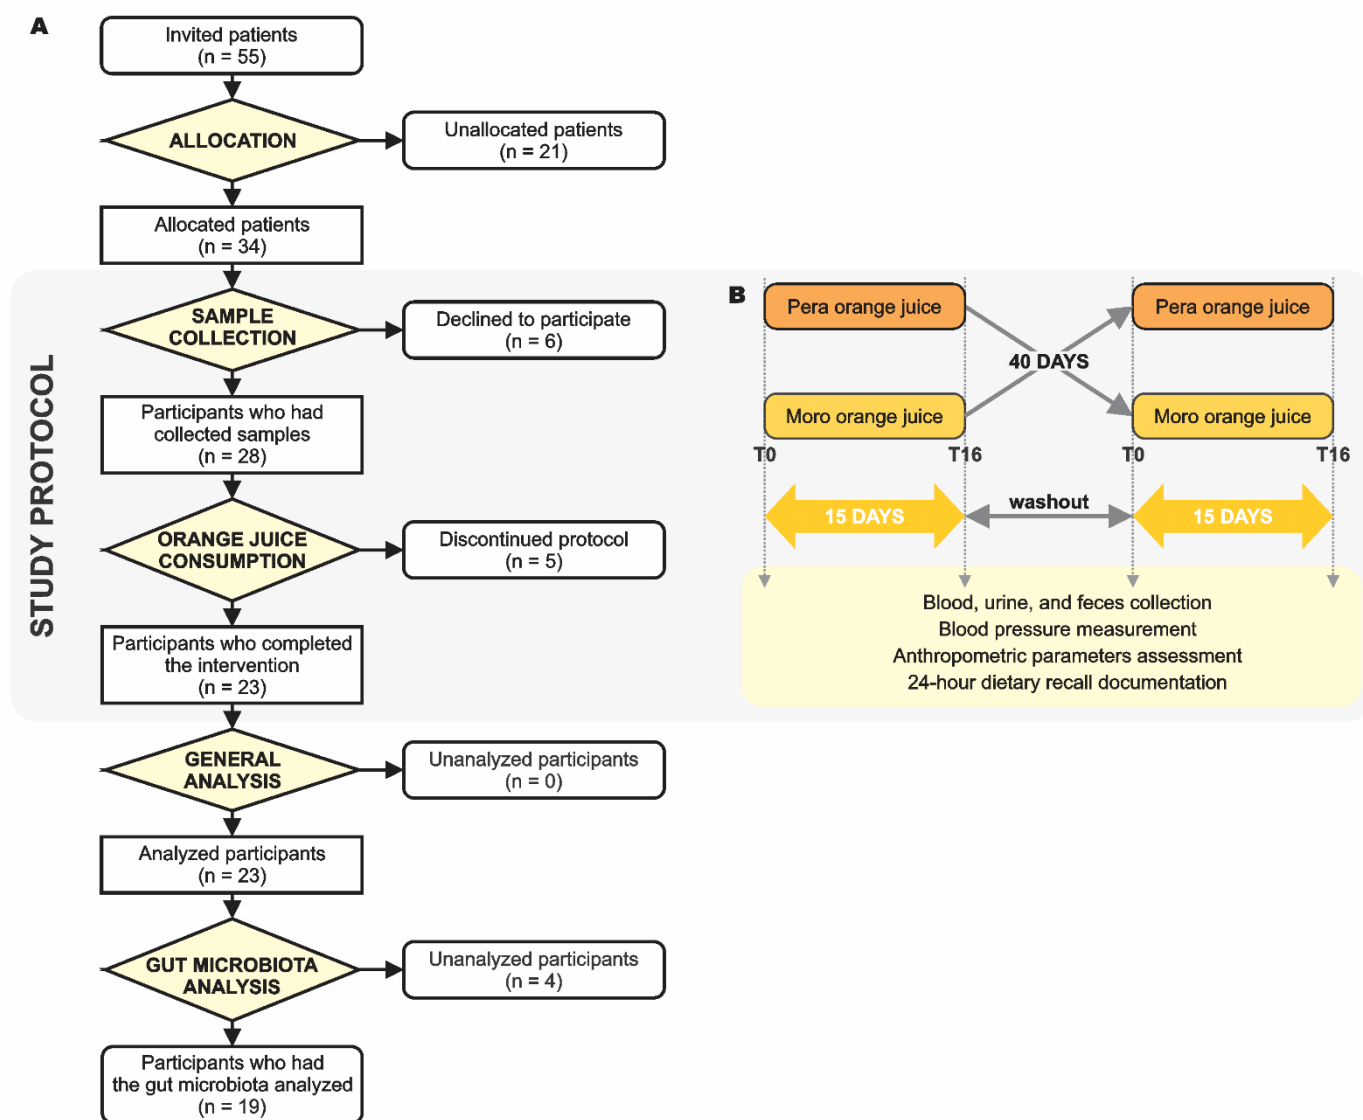

**Figure S1.** Flowchart of the clinical study **(A)** and schematic representation of the clinical study design **(B)**.

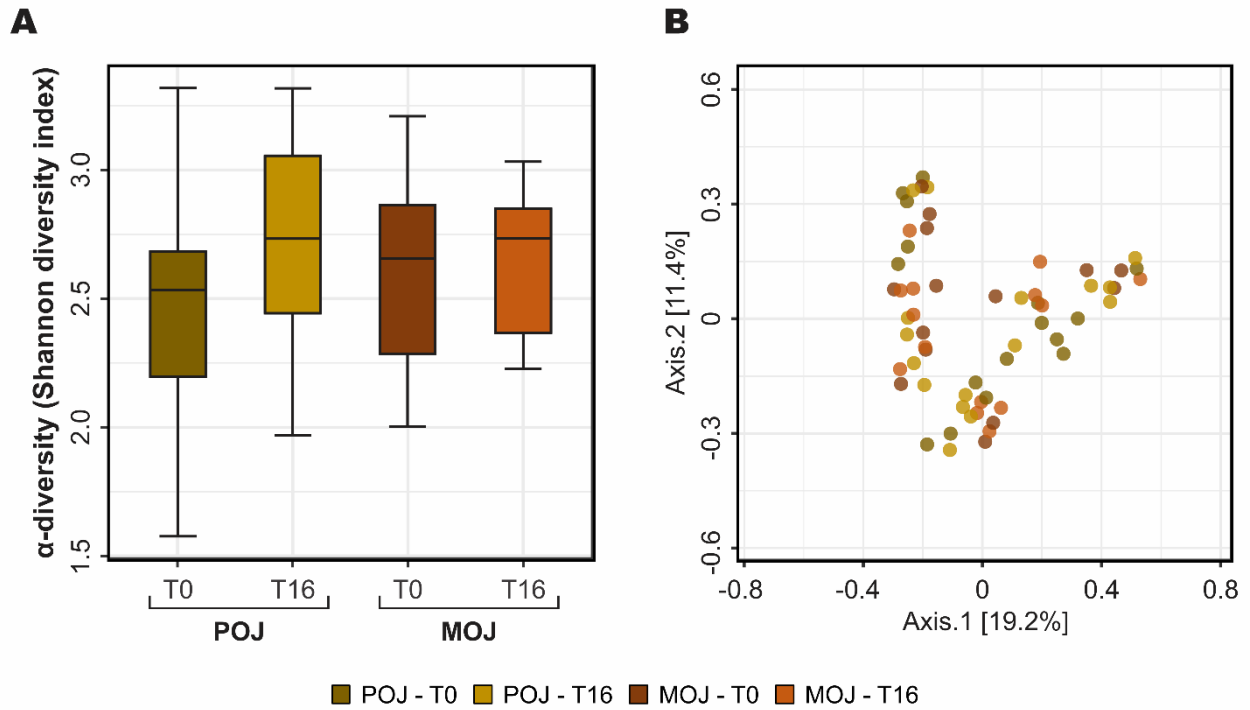

**Figure S2.** Gut microbiota diversity analysis. **(A)** Shannon diversity index as a measurement of alpha-diversity. **(B)** beta-diversity indicated by principal coordinates analyses (PCoA) plot. POJ: Pera orange juice. MOJ: Moro orange juice.

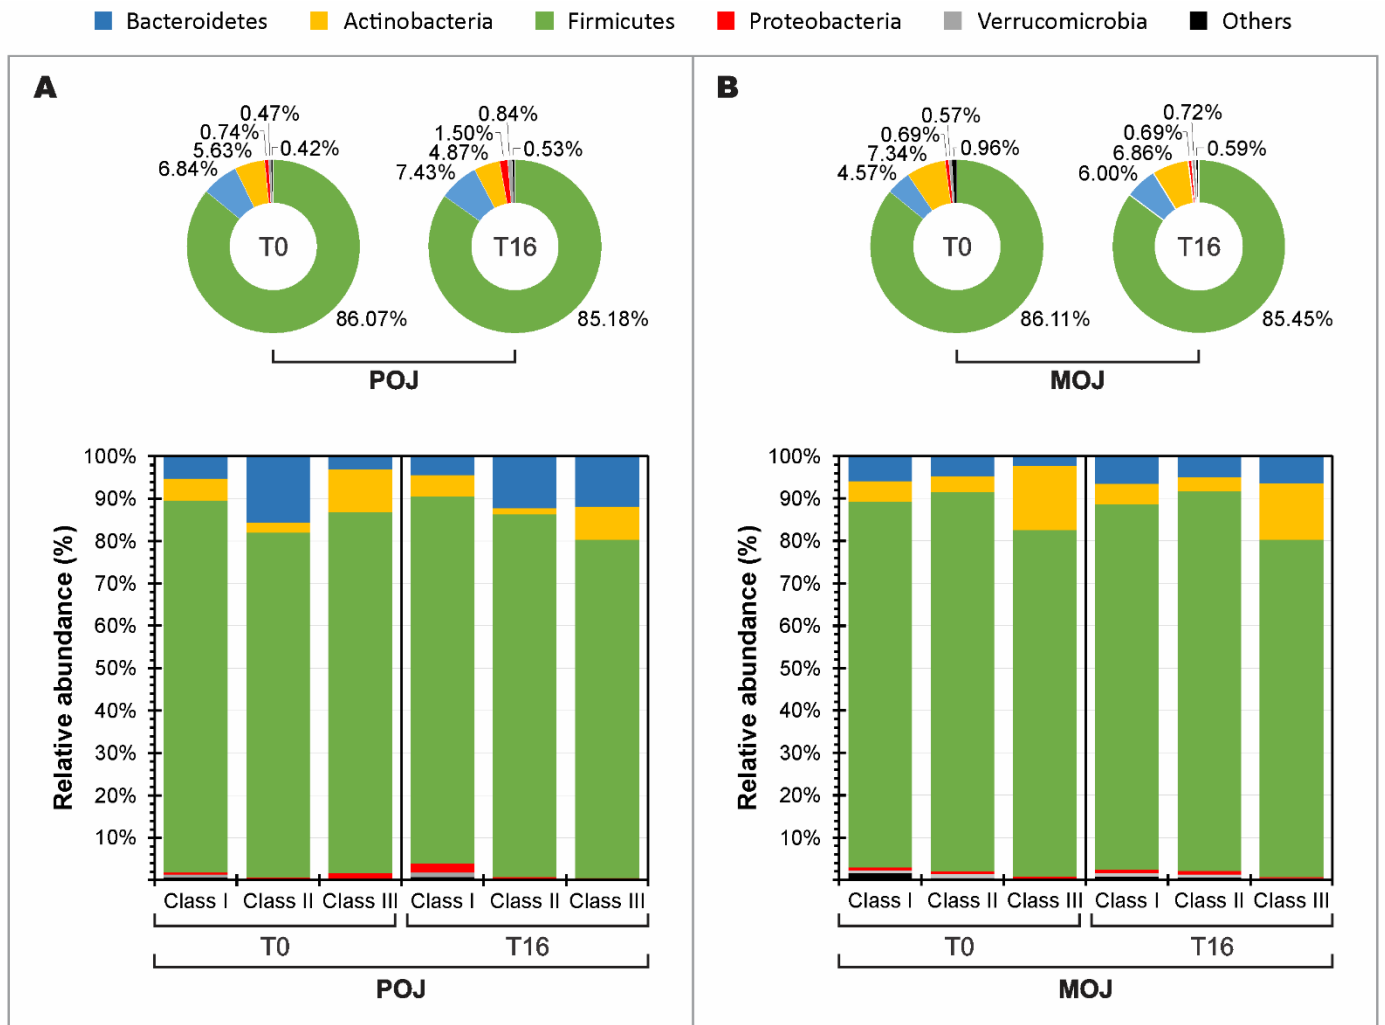

**Figure S3.** Effect of Pera (POJ) and Moro (MOJ) orange juice intake on the gut microbiota OTUs. Mean relative abundance **(A)** and relative abundance by obesity class **(B)** of the most abundant bacteria phyla in the gut microbiota of the patients before (T0) and after (T16) each intervention. OTU: Operational taxonomic unit.

**Table S1.** Quality parameters and chemical composition of pasteurized Pera and Moro orange juices

|                                                     | POJ            | MOJ             |
|-----------------------------------------------------|----------------|-----------------|
| Quality Parameters                                  |                |                 |
| pH                                                  | 3.52 ± 0.00    | 3.48 ± 0.00     |
| TSS (°Brix)                                         | 9.50 ± 0.00    | 10.00 ± 0.00    |
| Soluble sugars (mg.100 mL <sup>-1</sup> )           |                |                 |
| Sucrose                                             | 3.10 ± 0.25    | 2.80 ± 0.25     |
| Fructose                                            | 1.56 ± 0.10    | 1.90 ± 0.15     |
| Glucose                                             | 1.50 ± 0.08    | 1.69 ± 0.18     |
| Total                                               | 6.16           | 6.39            |
| Organic acids (mg.100 mL <sup>-1</sup> )            |                |                 |
| Citric acid                                         | 1092.36 ± 3.09 | 1161.94 ± 81.19 |
| Malic acid                                          | 301.77 ± 3.34  | 273.97 ± 18.50  |
| Ascorbic acid                                       | 16.00 ± 1.50   | 32.00 ± 2.60    |
| Tartaric acid                                       | N.D.           | 26.25 ± 0.95    |
| Total                                               | 1410.13        | 1494.16         |
| Total phenolic compounds (mg.100 mL <sup>-1</sup> ) | 50.31 ± 0.00   | 60.75 ± 0.01    |
| Dietary fiber (g.100 mL <sup>-1</sup> )             |                |                 |
| Soluble dietary fiber                               | 0.04 ± 0.01    | 0.08 ± 0.01     |
| Insoluble dietary fiber                             | 0.25 ± 0.05    | 0.26 ± 0.02     |
| Total dietary fiber                                 | 0.29           | 0.34            |

POJ: Pera orange juice. MOJ: Moro orange juice. TSS: Total soluble solids. N.D.: Not detected. Results are expressed as the mean ± standard error ( $n = 3$ ).



**Table S2.** Flavonoid content in pasteurized Pera and Moro orange juices

|                         | POJ                      |                           |       | MOJ                      |                           |       |
|-------------------------|--------------------------|---------------------------|-------|--------------------------|---------------------------|-------|
|                         | Supernatant              | Pellet                    | Total | Supernatant              | Pellet                    | Total |
| Narirutin               | 0.25 ± 0.03 <sup>a</sup> | 1.79 ± 0.08 <sup>a</sup>  | 2.04  | 0.14 ± 0.02 <sup>b</sup> | 0.40 ± 0.07 <sup>b</sup>  | 0.54  |
| Hesperidin              | 1.26 ± 0.44              | 28.40 ± 1.52 <sup>a</sup> | 29.66 | 1.48 ± 0.20              | 22.29 ± 2.11 <sup>b</sup> | 23.77 |
| Didymin                 | N.D.                     | N.D.                      | N.D.  | 0.42 ± 0.02              | 7.59 ± 0.42               | 8.01  |
| Total flavanones        | 1.51                     | 30.19                     | 31.70 | 2.04                     | 30.28                     | 32.32 |
| Cyn-3-O-glu             | N.D.                     | N.D.                      | N.D.  | 2.73 ± 0.08              | N.D.                      | 2.73  |
| Cyn-3-O-(malonyl)glu ** | N.D.                     | N.D.                      | N.D.  | 0.08 ± 0.03              | N.D.                      | 0.08  |
| Total anthocyanins      | N.D.                     | N.D.                      | N.D.  | 2.81                     | N.D.                      | 2.81  |
| Total flavonoids        | 1.51                     | 30.19                     | 31.70 | 4.85                     | 30.28                     | 35.13 |

POJ: Pera orange juice. MOJ: Moro orange juice. Cyn-3-O-glu: cyanidin-3-O-glucoside. Cyn-3-O-(malonyl)glu: cyanidin-3-O-(6"-malonyl)glucoside (quantified as cyanidin-3-O-glucoside equivalent). N.D.: Not detected. Results are expressed as mg.100 mL<sup>-1</sup> (mean ± standard error, *n* = 3). Different superscript letters indicate statistical significance (*p* < 0.05) between POJ and MOJ at each fraction.

**Table S3.** Creatinine and flavanone metabolites excreted by the patients before (T0) and after (T16) the consumption of Pera and Moro orange juices

|                                         | POJ                              |                                  |                 | MOJ                             |                                  |                 |
|-----------------------------------------|----------------------------------|----------------------------------|-----------------|---------------------------------|----------------------------------|-----------------|
|                                         | T0                               | T16                              | <i>p</i> -value | T0                              | T16                              | <i>p</i> -value |
| Creatinine (mg.dL <sup>-1</sup> )       | 136.01 ± 23.29                   | 113.68 ± 12.35                   | 0.733           | 130.82 ± 14.46                  | 120.42 ± 14.82                   | 0.354           |
| Narirutin metabolites (mg equivalents)  | <b>0.11 ± 0.03<sup>b</sup></b>   | <b>0.47 ± 0.14<sup>a</sup></b>   | <b>0.021</b>    | <b>0.35 ± 0.09<sup>b</sup></b>  | <b>0.71 ± 0.19<sup>a</sup></b>   | <b>0.013</b>    |
| Hesperidin metabolites (mg equivalents) | 0.26 ± 0.17                      | 0.64 ± 0.22                      | 0.110           | <b>0.72 ± 0.26<sup>b</sup></b>  | <b>1.46 ± 0.49<sup>a</sup></b>   | <b>0.028</b>    |
| Phenolic acids (mg equivalents)         | <b>32.26 ± 13.17<sup>b</sup></b> | <b>72.38 ± 19.34<sup>a</sup></b> | <b>0.043</b>    | <b>37.17 ± 6.39<sup>b</sup></b> | <b>77.15 ± 19.83<sup>a</sup></b> | <b>0.028</b>    |

POJ: Pera orange juice. MOJ: Moro orange juice. Results are expressed as the mean ± standard error (*n* = 23). The *p*-values were calculated using the Wilcoxon test. Values in bold and different superscript letters indicate statistical significance (*p* < 0.05) between T0 and T16.

**Table S4.** Energy and macronutrient consumption before (T0) and after (T16) the intervention with daily consumption of 500 mL of orange juice

|                                        | POJ              |                  |                 | MOJ              |                  |                 |
|----------------------------------------|------------------|------------------|-----------------|------------------|------------------|-----------------|
|                                        | T0               | T16              | <i>p</i> -value | T0               | T16              | <i>p</i> -value |
| Energy (kcal)                          | 1280.10 ± 127.74 | 1408.28 ± 112.34 | 0.287           | 1306.99 ± 103.72 | 1457.55 ± 109.76 | 0.191           |
| Carbohydrates (g.100 g <sup>-1</sup> ) | 172.27 ± 18.25   | 204.61 ± 17.31   | 0.162           | 180.21 ± 13.83   | 211.55 ± 20.02   | 0.144           |
| Proteins (g.100 g <sup>-1</sup> )      | 54.25 ± 5.52     | 63.48 ± 7.04     | 0.429           | 65.85 ± 9.67     | 60.72 ± 6.75     | 1.000           |
| Lipids (g.100 g <sup>-1</sup> )        | 41.54 ± 6.05     | 36.56 ± 4.46     | 0.484           | 37.80 ± 4.64     | 39.96 ± 4.07     | 0.648           |
| Cholesterol (mg.100 g <sup>-1</sup> )  | 173.30 ± 27.93   | 227.01 ± 43.90   | 0.227           | 232.25 ± 39.62   | 194.67 ± 32.77   | 0.661           |
| SFA (g.100 g <sup>-1</sup> )           | 9.88 ± 1.91      | 9.80 ± 1.83      | 0.833           | 11.07 ± 1.63     | 9.91 ± 1.54      | 0.456           |
| MUFA (g.100 g <sup>-1</sup> )          | 10.45 ± 2.13     | 9.22 ± 1.67      | 0.948           | 9.88 ± 1.53      | 8.65 ± 1.27      | 0.494           |
| PUFA (g.100 g <sup>-1</sup> )          | 7.85 ± 2.25      | 5.80 ± 1.03      | 0.820           | 6.77 ± 1.44      | 5.72 ± 0.80      | 0.637           |
| Dietary fiber (g.100 g <sup>-1</sup> ) | 11.41 ± 1.75     | 10.83 ± 1.36     | 0.976           | 11.13 ± 1.09     | 9.35 ± 1.00      | 0.224           |

POJ: Pera orange juice. MOJ: Moro orange juice. SFA: Saturated fatty acids. MUFA: Monounsaturated fatty acids. PUFA: polyunsaturated fatty acids. Results are expressed as the mean ± standard error (*n* = 23). The *p*-values were calculated using the Wilcoxon test. Values in bold and different superscript letters indicate statistical significance (*p* < 0.05) between T0 and T16.

**Table S5.** Anthropometric variables and biochemical parameters of patients with different classes of obesity before (T0) and after (T16) the consumption of Pera orange juice

|                                      | Obese I class<br>(n = 12)         |                                  |                 | Obese II class<br>(n = 5) |                |                 | Obese III class<br>(n = 6) |                |                 |
|--------------------------------------|-----------------------------------|----------------------------------|-----------------|---------------------------|----------------|-----------------|----------------------------|----------------|-----------------|
|                                      | T0                                | T16                              | <i>p</i> -value | T0                        | T16            | <i>p</i> -value | T0                         | T16            | <i>p</i> -value |
| Body weight (kg)                     | 87.81 ± 3.44                      | 88.06 ± 3.59                     | 0.610           | 99.96 ± 2.63              | 98.94 ± 3.41   | 0.686           | 103.25 ± 5.20              | 103.42 ± 4.85  | 0.293           |
| Abdominal circumference (cm)         | 108.75 ± 1.81                     | 109.38 ± 1.71                    | 0.498           | 118.96 ± 2.08             | 117.40 ± 2.29  | 0.461           | 125.58 ± 3.62              | 125.08 ± 3.12  | 0.400           |
| BMI (kg.m <sup>-2</sup> )            | 32.48 ± 0.40                      | 32.54 ± 0.36                     | 0.638           | 37.35 ± 0.83              | 36.95 ± 0.98   | 0.686           | 44.46 ± 2.33               | 44.54 ± 2.18   | 0.249           |
| Blood pressure (mmHg)                |                                   |                                  |                 |                           |                |                 |                            |                |                 |
| Systolic                             | 130.92 ± 5.26                     | 126.58 ± 4.58                    | 0.444           | 134.40 ± 4.58             | 119.40 ± 7.61  | 0.138           | 133.83 ± 4.09              | 129.50 ± 7.18  | 0.463           |
| Diastolic                            | 81.83 ± 3.52                      | 81.00 ± 3.56                     | 0.052           | 76.40 ± 4.11              | 71.60 ± 4.20   | 1.000           | 88.17 ± 3.88               | 84.00 ± 5.27   | 0.344           |
| Cholesterol (mg.dL <sup>-1</sup> )   |                                   |                                  |                 |                           |                |                 |                            |                |                 |
| HDL                                  | 42.33 ± 2.29                      | 40.33 ± 1.88                     | 0.116           | 48.60 ± 3.40              | 47.80 ± 2.33   | 0.273           | 50.83 ± 5.02               | 45.33 ± 2.56   | 0.345           |
| LDL                                  | 105.42 ± 8.69                     | 99.75 ± 7.42                     | 0.071           | 122.00 ± 13.61            | 135.00 ± 13.41 | 0.498           | 101.00 ± 15.80             | 91.83 ± 12.46  | 0.463           |
| VLDL                                 | 31.92 ± 2.94                      | 29.83 ± 2.80                     | 0.666           | 23.00 ± 4.66              | 20.80 ± 2.29   | 0.500           | 32.33 ± 4.22               | 32.33 ± 4.19   | 0.344           |
| Total                                | <b>180.25 ± 10.53<sup>a</sup></b> | <b>170.42 ± 8.17<sup>b</sup></b> | <b>0.004</b>    | 193.60 ± 15.80            | 203.60 ± 12.27 | 0.500           | 184.17 ± 14.56             | 169.50 ± 12.15 | 0.917           |
| Triglycerides (mg.dL <sup>-1</sup> ) | 161.25 ± 14.43                    | 148.42 ± 14.17                   | 0.272           | 115.20 ± 23.21            | 104.60 ± 12.03 | 0.500           | 161.33 ± 20.97             | 161.83 ± 20.85 | 0.344           |
| Blood glucose (mg.dL <sup>-1</sup> ) | 95.42 ± 2.65                      | 93.08 ± 1.76                     | 0.929           | 92.40 ± 2.44              | 94.60 ± 3.31   | 0.715           | 94.83 ± 4.71               | 97.33 ± 4.12   | 0.917           |

BMI: Body mass index. HDL: High-density lipoprotein. LDL: Low-density lipoprotein. VLDL: Very low-density lipoprotein. The *p*-values were calculated using the Wilcoxon test. Values in bold and different superscript letters indicate statistical significance (*p* < 0.05) between T0 and T16 for each class of obesity (mean ± standard error).

**Table S6.** Anthropometric variables and biochemical parameters of patients with different classes of obesity before (T0) and after (T16) the consumption of Moro orange juice

|                                      | Obese I class<br>(n = 12) |                |                 | Obese II class<br>(n = 5) |                |                 | Obese III class<br>(n = 6)      |                                 |                 |
|--------------------------------------|---------------------------|----------------|-----------------|---------------------------|----------------|-----------------|---------------------------------|---------------------------------|-----------------|
|                                      | T0                        | T16            | <i>p</i> -value | T0                        | T16            | <i>p</i> -value | T0                              | T16                             | <i>p</i> -value |
| Body weight (kg)                     | 87.35 ± 3.51              | 87.20 ± 3.60   | 0.307           | 97.73 ± 3.39              | 97.98 ± 3.66   | 0.273           | 103.20 ± 4.46                   | 102.80 ± 4.54                   | 0.462           |
| Abdominal circumference (cm)         | 108.71 ± 1.84             | 109.29 ± 2.14  | 0.836           | 116.40 ± 1.33             | 117.00 ± 2.26  | 0.336           | 124.33 ± 2.87                   | 118.48 ± 4.88                   | 0.680           |
| BMI (kg.m <sup>-2</sup> )            | 32.28 ± 0.33              | 32.21 ± 0.34   | 0.367           | 36.51 ± 1.11              | 36.61 ± 1.26   | 0.273           | 44.41 ± 1.84                    | 44.21 ± 1.73                    | 0.600           |
| Blood pressure (mmHg)                |                           |                |                 |                           |                |                 |                                 |                                 |                 |
| Systolic                             | 129.17 ± 4.12             | 126.25 ± 4.68  | 0.272           | 130.20 ± 3.92             | 120.80 ± 4.07  | 0.225           | 128.33 ± 3.87                   | 131.00 ± 4.58                   | 0.463           |
| Diastolic                            | 83.92 ± 3.18              | 80.42 ± 3.80   | 0.784           | 73.00 ± 0.84              | 73.40 ± 2.86   | 0.138           | 83.17 ± 3.03                    | 82.50 ± 3.97                    | 0.207           |
| Cholesterol (mg.dL <sup>-1</sup> )   |                           |                |                 |                           |                |                 |                                 |                                 |                 |
| HDL                                  | 45.25 ± 2.82              | 43.00 ± 2.94   | 0.134           | 50.60 ± 3.89              | 49.00 ± 2.90   | 0.715           | 50.50 ± 2.92                    | 48.33 ± 3.61                    | 0.138           |
| LDL                                  | 123.25 ± 14.82            | 113.67 ± 13.53 | 0.146           | 121.20 ± 9.32             | 114.80 ± 13.50 | 0.500           | 96.50 ± 7.52                    | 98.67 ± 11.50                   | 0.207           |
| VLDL                                 | 34.33 ± 3.62              | 31.67 ± 4.15   | 0.533           | 23.60 ± 2.16              | 22.00 ± 3.58   | 0.686           | 36.50 ± 3.99                    | 34.00 ± 4.49                    | 1.000           |
| Total                                | 206.83 ± 14.49            | 185.25 ± 13.18 | 0.100           | 195.40 ± 10.52            | 185.80 ± 13.68 | 0.686           | 181.00 ± 9.16                   | 182.17 ± 15.01                  | 0.173           |
| Triglycerides (mg.dL <sup>-1</sup> ) | 193.50 ± 26.94            | 158.00 ± 20.76 | 0.480           | 117.60 ± 10.72            | 111.00 ± 17.56 | 0.686           | 182.17 ± 19.66                  | 170.33 ± 22.11                  | 0.893           |
| Blood glucose (mg.dL <sup>-1</sup> ) | 96.50 ± 2.63              | 97.08 ± 1.95   | 0.287           | 94.80 ± 2.11              | 95.60 ± 2.68   | 0.500           | <b>99.17 ± 4.14<sup>a</sup></b> | <b>98.50 ± 2.36<sup>b</sup></b> | <b>0.041</b>    |

BMI: Body mass index. HDL: High-density lipoprotein. LDL: Low-density lipoprotein. VLDL: Very low-density lipoprotein. The *p*-values were calculated using the Wilcoxon test. Values in bold and different superscript letters indicate statistical significance (*p* < 0.05) between T0 and T16 for each class of obesity (mean ± standard error).

**Table S7.** Inflammatory biomarkers of patients with different classes of obesity before (T0) and after (T16) the consumption of Pera and Moro orange juices

|                              | Obese I class<br>(n = 12)         |                                    |                 | Obese II class<br>(n = 5) |                  |                 | Obese III class<br>(n = 6)        |                                   |                 |
|------------------------------|-----------------------------------|------------------------------------|-----------------|---------------------------|------------------|-----------------|-----------------------------------|-----------------------------------|-----------------|
|                              | T0                                | T16                                | <i>p</i> -value | T0                        | T16              | <i>p</i> -value | T0                                | T16                               | <i>p</i> -value |
| <b>Pera orange juice</b>     |                                   |                                    |                 |                           |                  |                 |                                   |                                   |                 |
| IL-6 (pg.mL <sup>-1</sup> )  | 5.26 ± 1.06                       | 5.53 ± 0.92                        | 0.424           | 4.45 ± 1.33               | 2.68 ± 0.26      | 0.465           | 6.74 ± 2.30                       | 6.36 ± 1.97                       | 0.345           |
| IL-10 (pg.mL <sup>-1</sup> ) | 1.05 ± 0.16                       | 1.46 ± 0.43                        | 0.221           | 0.93 ± 0.26               | 1.15 ± 0.29      | 0.893           | 1.06 ± 0.26                       | 1.00 ± 0.24                       | 0.893           |
| TNF-α (pg.mL <sup>-1</sup> ) | 97.33 ± 29.80                     | 178.67 ± 34.98                     | 0.499           | 78.25 ± 15.15             | 200.00 ± 55.45   | 0.686           | <b>110.00 ± 51.70<sup>a</sup></b> | <b>105.50 ± 48.95<sup>b</sup></b> | <b>0.043</b>    |
| IL-8 (pg.mL <sup>-1</sup> )  | <b>623.60 ± 82.01<sup>b</sup></b> | <b>639.00 ± 138.67<sup>a</sup></b> | <b>0.026</b>    | 689.00 ± 162.17           | 606.40 ± 154.78  | 0.345           | 678.00 ± 143.83                   | 736.00 ± 79.38                    | 0.500           |
| IL-1β (pg.mL <sup>-1</sup> ) | 196.14 ± 54.67                    | 206.00 ± 89.18                     | 0.314           | 377.50 ± 283.86           | 370.75 ± 250.19  | 0.080           | 230.25 ± 93.21                    | 152.00 ± 99.88                    | 0.715           |
| MCP-1 (pg.mL <sup>-1</sup> ) | 6983.89 ± 2652.45                 | 4120.78 ± 468.29                   | 0.333           | 4908.20 ± 1593.20         | 3407.20 ± 302.87 | 0.893           | 3223.75 ± 1122.10                 | 2686.00 ± 490.26                  | 0.893           |
| <b>Moro orange juice</b>     |                                   |                                    |                 |                           |                  |                 |                                   |                                   |                 |
| IL-6 (pg.mL <sup>-1</sup> )  | 5.47 ± 1.57                       | 3.80 ± 0.67                        | 0.799           | 6.48 ± 4.00               | 2.79 ± 0.47      | 0.080           | 5.68 ± 0.86                       | 4.77 ± 1.06                       | 0.285           |
| IL-10 (pg.mL <sup>-1</sup> ) | 1.24 ± 0.36                       | 1.37 ± 0.15                        | 0.515           | 1.43 ± 0.24               | 1.40 ± 0.34      | 0.138           | 1.12 ± 0.31                       | 0.97 ± 0.17                       | 0.854           |
| TNF-α (pg.mL <sup>-1</sup> ) | 136.75 ± 33.45                    | 184.38 ± 41.50                     | 0.249           | 144.00 ± 34.81            | 137.40 ± 66.52   | 0.345           | 173.00 ± 49.50                    | 94.00 ± 51.93                     | 0.713           |
| IL-8 (pg.mL <sup>-1</sup> )  | 666.00 ± 106.42                   | 519.45 ± 124.49                    | 0.721           | 811.40 ± 162.54           | 593.60 ± 84.02   | 0.068           | 805.20 ± 142.95                   | 803.00 ± 157.51                   | 0.465           |
| IL-1β (pg.mL <sup>-1</sup> ) | 213.90 ± 70.82                    | 205.40 ± 78.41                     | 0.917           | 343.20 ± 159.96           | 195.40 ± 101.76  | 1.000           | 234.40 ± 72.34                    | 230.20 ± 81.56                    | 0.068           |
| MCP-1 (pg.mL <sup>-1</sup> ) | 12245.00 ± 4702.55                | 4048.20 ± 513.73                   | 0.374           | 4218.60 ± 615.44          | 4049.40 ± 869.92 | 0.500           | 6432.80 ± 3066.14                 | 3897.60 ± 638.89                  | 0.715           |

IL: interleukin. TNF-α: tumor necrosis factor alpha. MCP-1: monocyte chemoattractant protein-1. The *p*-values were calculated using the Wilcoxon test. Values in bold and different superscript letters indicate statistical significance (*p* < 0.05) between T0 and T16 for each class of obesity (mean ± standard error).

**Table S8.** Oxidative stress biomarkers of patients with different classes of obesity before (T0) and after (T16) the consumption of Pera and Moro orange juices

|                                                   | Obese I class<br>(n = 12)                     |                                               |                 | Obese II class<br>(n = 5)                     |                                               |                 | Obese III class<br>(n = 6)                    |                                               |                 |
|---------------------------------------------------|-----------------------------------------------|-----------------------------------------------|-----------------|-----------------------------------------------|-----------------------------------------------|-----------------|-----------------------------------------------|-----------------------------------------------|-----------------|
|                                                   | T0                                            | T16                                           | <i>p</i> -value | T0                                            | T16                                           | <i>p</i> -value | T0                                            | T16                                           | <i>p</i> -value |
| <b>Pera orange juice</b>                          |                                               |                                               |                 |                                               |                                               |                 |                                               |                                               |                 |
| Plasma                                            |                                               |                                               |                 |                                               |                                               |                 |                                               |                                               |                 |
| ORAC ( $\mu\text{M}$ eq Trolox.mL <sup>-1</sup> ) | 2.51 $\pm$ 0.23                               | 2.81 $\pm$ 0.23                               | 0.480           | 2.35 $\pm$ 0.35                               | 2.86 $\pm$ 0.45                               | 0.068           | 2.41 $\pm$ 0.19                               | 2.62 $\pm$ 0.29                               | 0.344           |
| GPx (U.mg <sup>-1</sup> )                         | 0.72 $\pm$ 0.14                               | 0.59 $\pm$ 0.10                               | 0.610           | 1.49 $\pm$ 0.31                               | 0.68 $\pm$ 0.23                               | 0.080           | <b>0.91 <math>\pm</math> 0.16<sup>b</sup></b> | <b>1.01 <math>\pm</math> 0.06<sup>a</sup></b> | <b>0.046</b>    |
| SOD (U.mg <sup>-1</sup> )                         | 2.98 $\pm$ 0.46                               | 3.66 $\pm$ 0.41                               | 0.262           | 2.23 $\pm$ 0.94                               | 2.34 $\pm$ 0.74                               | 0.068           | 1.76 $\pm$ 0.67                               | 2.68 $\pm$ 0.91                               | 0.144           |
| Urine                                             |                                               |                                               |                 |                                               |                                               |                 |                                               |                                               |                 |
| 8-isoprostane (pg.mg <sup>-1</sup> )              | 2.29 $\pm$ 0.35                               | 2.53 $\pm$ 0.22                               | 0.695           | 3.87 $\pm$ 2.21                               | 1.78 $\pm$ 0.40                               | 0.893           | 2.02 $\pm$ 0.35                               | 1.37 $\pm$ 0.15                               | 0.600           |
| 8-OHdG (ng.mg <sup>-1</sup> )                     | <b>1.53 <math>\pm</math> 0.30<sup>a</sup></b> | <b>0.58 <math>\pm</math> 0.15<sup>b</sup></b> | <b>0.002</b>    | 1.70 $\pm$ 0.78                               | 0.32 $\pm$ 0.07                               | 0.500           | <b>1.73 <math>\pm</math> 0.59<sup>a</sup></b> | <b>0.38 <math>\pm</math> 0.08<sup>b</sup></b> | <b>0.028</b>    |
| <b>Moro orange juice</b>                          |                                               |                                               |                 |                                               |                                               |                 |                                               |                                               |                 |
| Plasma                                            |                                               |                                               |                 |                                               |                                               |                 |                                               |                                               |                 |
| ORAC ( $\mu\text{M}$ eq Trolox.mL <sup>-1</sup> ) | 2.79 $\pm$ 0.23                               | 2.89 $\pm$ 0.25                               | 0.099           | <b>3.59 <math>\pm</math> 0.16<sup>a</sup></b> | <b>3.26 <math>\pm</math> 0.09<sup>b</sup></b> | <b>0.043</b>    | 3.01 $\pm$ 0.30                               | 3.10 $\pm$ 0.28                               | 0.463           |
| GPx (U.mg <sup>-1</sup> )                         | 0.93 $\pm$ 0.14                               | 0.83 $\pm$ 0.11                               | 0.444           | 1.19 $\pm$ 0.26                               | 0.72 $\pm$ 0.16                               | 0.144           | 1.37 $\pm$ 0.22                               | 0.62 $\pm$ 0.08                               | 0.674           |
| SOD (U.mg <sup>-1</sup> )                         | 3.98 $\pm$ 0.40                               | 3.36 $\pm$ 0.51                               | 0.386           | 3.39 $\pm$ 0.77                               | 2.58 $\pm$ 0.57                               | 1.000           | 3.33 $\pm$ 0.33                               | 4.12 $\pm$ 0.42                               | 0.465           |
| Urine                                             |                                               |                                               |                 |                                               |                                               |                 |                                               |                                               |                 |
| 8-isoprostane (pg.mg <sup>-1</sup> )              | 2.51 $\pm$ 0.33                               | 2.60 $\pm$ 0.46                               | 0.508           | 1.82 $\pm$ 0.26                               | 2.49 $\pm$ 1.19                               | 0.686           | 2.91 $\pm$ 0.33                               | 2.66 $\pm$ 0.45                               | 0.116           |
| 8-OHdG (ng.mg <sup>-1</sup> )                     | <b>1.36 <math>\pm</math> 0.25<sup>a</sup></b> | <b>0.43 <math>\pm</math> 0.06<sup>b</sup></b> | <b>0.011</b>    | <b>0.66 <math>\pm</math> 0.08<sup>a</sup></b> | <b>0.57 <math>\pm</math> 0.24<sup>b</sup></b> | <b>0.043</b>    | <b>1.36 <math>\pm</math> 0.19<sup>a</sup></b> | <b>0.78 <math>\pm</math> 0.22<sup>b</sup></b> | <b>0.046</b>    |

8-OHdG: 8-hydroxy-2'-deoxyguanosine. GPx: glutathione Peroxidase. ORAC: oxygen radical absorbance capacity. SOD: superoxide dismutase.

The *p*-values were calculated using the Wilcoxon test. Values in bold and different superscript letters indicate statistical significance (*p* < 0.05) between T0 and T16 for each class of obesity (mean  $\pm$  standard error).

**Table S9.** Relative abundance of significant gut microbiota phyla and Firmicutes/Bacteroidetes ratio in patients before (T0) and after (T16) Pera and Moro orange juice intake

|                 | POJ                              |                                 |                 | MOJ           |               |                 |
|-----------------|----------------------------------|---------------------------------|-----------------|---------------|---------------|-----------------|
|                 | T0                               | T16                             | <i>p</i> -value | T0            | T16           | <i>p</i> -value |
| Firmicutes      | 86.07 ± 2.55                     | 85.18 ± 1.97                    | 0.256           | 86.11 ± 1.62  | 85.45 ± 1.86  | 0.500           |
| Bacteroidetes   | 6.84 ± 2.76                      | 7.43 ± 1.97                     | 0.394           | 4.57 ± 0.77   | 6.00 ± 1.04   | 0.122           |
| F/B ratio       | <b>60.66 ± 19.06<sup>a</sup></b> | <b>25.16 ± 7.96<sup>b</sup></b> | <b>0.041</b>    | 51.56 ± 23.70 | 40.00 ± 13.22 | 0.231           |
| Actinobacteria  | 5.63 ± 1.20                      | 4.87 ± 1.17                     | 0.691           | 7.34 ± 1.80   | 6.86 ± 1.75   | 0.811           |
| Proteobacteria  | 0.74 ± 0.27                      | 1.50 ± 0.63                     | 0.233           | 0.73 ± 0.23   | 0.69 ± 0.20   | 0.723           |
| Verrucomicrobia | 0.52 ± 0.21                      | 0.84 ± 0.36                     | 0.484           | 0.57 ± 0.25   | 0.76 ± 0.38   | 0.445           |
| Others          | 0.42 ± 0.11                      | 0.53 ± 0.14                     | 0.173           | 0.96 ± 0.36   | 0.59 ± 0.14   | 0.528           |

POJ: Pera orange juice. MOJ: Moro orange juice. F/B: Firmicutes/Bacteroidetes ratio.

Results are expressed as the mean ± standard error (*n* = 16). The *p*-values were calculated using the Wilcoxon test. Values in bold and different superscript letters indicate statistical significance (*p* < 0.05) between T0 and T16.



**Table S10.** Relative abundance of significant gut microbiota phyla and Firmicutes/Bacteroidetes ratio in patients with different classes of obesity before (T0) and after (T16) Pera and Moro orange juice intake

|                          | Obese I class |               |                 | Obese II class |              |                 | Obese III class                   |                                  |                 |
|--------------------------|---------------|---------------|-----------------|----------------|--------------|-----------------|-----------------------------------|----------------------------------|-----------------|
|                          | T0            | T16           | <i>p</i> -value | T0             | T16          | <i>p</i> -value | T0                                | T16                              | <i>p</i> -value |
| <b>Pera orange juice</b> |               |               |                 |                |              |                 |                                   |                                  |                 |
| Firmicutes               | 87.96 ± 1.72  | 86.86 ± 1.91  | 0.260           | 81.45 ± 12.70  | 85.47 ± 7.17 | 0.593           | 84.99 ± 3.88                      | 79.86 ± 4.72                     | 0.285           |
| Bacteroidetes            | 5.20 ± 1.68   | 4.39 ± 0.76   | 0.953           | 15.55 ± 13.45  | 12.17 ± 7.82 | 1.000           | 3.03 ± 1.53                       | 11.82 ± 5.69                     | 0.109           |
| F/B ratio                | 61.98 ± 27.65 | 33.25 ± 12.61 | 0.374           | 49.43 ± 36.22  | 15.17 ± 6.44 | 0.285           | 67.93 ± 46.14                     | 10.88 ± 4.54                     | 0.109           |
| Actinobacteria           | 5.19 ± 0.92   | 5.03 ± 1.18   | 0.953           | 2.39 ± 0.99    | 1.43 ± 0.67  | 0.109           | 10.19 ± 4.87                      | 7.8 ± 4.55                       | 1.000           |
| Proteobacteria           | 0.54 ± 0.14   | 2.18 ± 0.99   | 0.139           | 0.44 ± 0.22    | 0.69 ± 0.48  | 1.000           | 1.64 ± 1.36                       | 0.30 ± 0.14                      | 1.000           |
| Verrucomicrobia          | 0.67 ± 0.26   | 1.12 ± 0.43   | 0.345           | 0.09 ± 0.00    | 0.02 ± 0.00  | -               | 0.08 ± 0.00                       | 0.02 ± 0.00                      | -               |
| Others                   | 0.66 ± 0.16   | 0.80 ± 0.19   | 0.260           | 0.11 ± 0.06    | 0.16 ± 0.10  | 0.285           | 0.12 ± 0.09                       | 0.22 ± 0.21                      | 1.000           |
| <b>Moro orange juice</b> |               |               |                 |                |              |                 |                                   |                                  |                 |
| Firmicutes               | 86.47 ± 1.89  | 86.41 ± 2.48  | 0.889           | 89.94 ± 1.85   | 89.77 ± 1.36 | 0.893           | 81.72 ± 4.24                      | 79.61 ± 4.53                     | 0.345           |
| Bacteroidetes            | 5.93 ± 0.87   | 6.45 ± 1.78   | 0.575           | 4.68 ± 1.92    | 4.96 ± 1.27  | 0.686           | <b>2.30 ± 1.08<sup>b</sup></b>    | <b>6.33 ± 2.38<sup>a</sup></b>   | <b>0.043</b>    |
| F/B ratio                | 17.77 ± 3.45  | 38.69 ± 16.36 | 0.575           | 28.65 ± 6.17   | 25.04 ± 7.25 | 0.686           | <b>128.53 ± 80.33<sup>a</sup></b> | <b>57.06 ± 41.74<sup>b</sup></b> | <b>0.043</b>    |
| Actinobacteria           | 4.70 ± 1.77   | 4.93 ± 2.00   | 0.484           | 3.71 ± 1.63    | 3.36 ± 0.96  | 0.893           | 15.19 ± 4.06                      | 13.47 ± 4.41                     | 0.686           |
| Proteobacteria           | 0.87 ± 0.39   | 0.78 ± 0.29   | 0.612           | 0.63 ± 0.40    | 0.89 ± 0.54  | 0.138           | 0.63 ± 0.46                       | 0.35 ± 0.12                      | 0.893           |
| Verrucomicrobia          | 0.47 ± 0.25   | 0.83 ± 0.65   | 0.917           | 0.93 ± 0.70    | 0.75 ± 0.15  | 1.000           | 0.09 ± 0.00                       | 0.37 ± 0.00                      | -               |
| Others                   | 1.78 ± 0.71   | 0.90 ± 0.24   | 0.779           | 0.48 ± 0.19    | 0.57 ± 0.26  | 0.225           | 0.14 ± 0.06                       | 0.12 ± 0.06                      | 0.500           |

F/B: Firmicutes/Bacteroidetes ratio. Results are expressed as the mean ± standard error. The *p*-values were calculated using the Wilcoxon test.

Values in bold and different superscript letters indicate statistical significance (*p* < 0.05) between T0 and T16 for each class of obesity.

**Table S11.** Relative abundance of significant gut microbiota OTUs (bacterial genera) in patients before (T0) and after (T16) Pera and Moro orange juices intake

| ID | OTU                                   | POJ                            |                                |              | MOJ                            |                                |              |
|----|---------------------------------------|--------------------------------|--------------------------------|--------------|--------------------------------|--------------------------------|--------------|
|    |                                       | T0                             | T16                            | p-value      | T0                             | T16                            | p-value      |
| 01 | [Eubacterium]_coprostanoligenes_group | 2.77 ± 0.63                    | 2.84 ± 0.60                    | 0.820        | <b>2.11 ± 0.53<sup>b</sup></b> | <b>2.97 ± 0.64<sup>a</sup></b> | <b>0.044</b> |
| 02 | [Eubacterium]_ruminantium_group       | 0.43 ± 0.12                    | 1.10 ± 0.54                    | 0.345        | 0.60 ± 0.16                    | 0.48 ± 0.23                    | 0.463        |
| 03 | [Ruminococcus]_gauvreauui_group       | 0.86 ± 0.30                    | 0.82 ± 0.32                    | 0.173        | 0.88 ± 0.33                    | 1.11 ± 0.37                    | 0.570        |
| 04 | [Ruminococcus]_gnavus_group           | 1.10 ± 0.71                    | 0.23 ± 0.09                    | 0.225        | 0.73 ± 0.51                    | 1.36 ± 0.94                    | 0.600        |
| 05 | [Ruminococcus]_torques_group          | <b>1.70 ± 0.50<sup>a</sup></b> | <b>1.01 ± 0.20<sup>b</sup></b> | <b>0.046</b> | 0.84 ± 0.17                    | 1.10 ± 0.30                    | 0.653        |
| 06 | Agathobacter                          | 10.94 ± 3.65                   | 6.04 ± 1.44                    | 0.191        | 13.05 ± 1.92                   | 9.85 ± 1.80                    | 0.078        |
| 07 | Akkermansia                           | 0.52 ± 0.21                    | 0.84 ± 0.36                    | 0.484        | 0.57 ± 0.25                    | 0.76 ± 0.37                    | 0.445        |
| 08 | Alistipes                             | 0.91 ± 0.49                    | 0.99 ± 0.41                    | 0.125        | 0.50 ± 0.12                    | 0.51 ± 0.10                    | 0.811        |
| 09 | Anaerostipes                          | 1.40 ± 1.36                    | 3.11 ± 2.30                    | 0.138        | 0.29 ± 0.19                    | 0.33 ± 0.19                    | 0.441        |
| 10 | Bacteroides                           | 4.20 ± 1.88                    | 4.64 ± 1.40                    | 0.532        | 2.52 ± 0.50                    | 3.74 ± 0.82                    | 0.267        |
| 11 | Bifidobacterium                       | 4.31 ± 1.32                    | 3.33 ± 1.14                    | 0.433        | 4.62 ± 1.48                    | 3.65 ± 1.15                    | 0.352        |
| 12 | Blautia                               | <b>6.91 ± 1.28<sup>a</sup></b> | <b>5.13 ± 1.07<sup>b</sup></b> | <b>0.011</b> | 6.49 ± 1.20                    | 6.02 ± 1.38                    | 0.446        |
| 13 | Butyricicoccus                        | 0.69 ± 0.15                    | 0.70 ± 0.14                    | 0.955        | 0.97 ± 0.20                    | 1.02 ± 0.14                    | 0.586        |
| 14 | Butyrivibrio                          | 3.48 ± 1.98                    | 1.68 ± 0.60                    | 0.144        | 1.07 ± 0.97                    | 1.14 ± 0.99                    | 0.345        |
| 15 | Catenibacterium                       | 4.11 ± 1.70                    | 4.04 ± 1.52                    | 0.575        | 4.25 ± 1.32                    | 4.77 ± 1.56                    | 0.248        |
| 16 | Christensenellaceae_R-7_group         | 3.69 ± 0.87                    | 3.07 ± 0.75                    | 0.609        | 2.83 ± 0.41                    | 4.20 ± 0.99                    | 0.679        |
| 17 | Collinsella                           | 1.24 ± 0.20                    | 1.39 ± 0.27                    | 0.861        | 2.48 ± 0.86                    | 3.09 ± 1.42                    | 0.535        |
| 18 | Coprococcus_2                         | 1.46 ± 0.58                    | 1.93 ± 0.9                     | 0.310        | 2.29 ± 0.59                    | 2.42 ± 0.86                    | 0.799        |
| 19 | Coprococcus_3                         | 1.37 ± 0.68                    | 1.19 ± 0.42                    | 0.778        | 1.18 ± 0.19                    | 1.53 ± 0.41                    | 0.918        |
| 20 | Dialister                             | <b>1.52 ± 0.42<sup>b</sup></b> | <b>2.83 ± 0.80<sup>a</sup></b> | <b>0.050</b> | 3.22 ± 0.51                    | 3.11 ± 0.5                     | 0.767        |
| 21 | Dorea                                 | 2.34 ± 0.51                    | 1.98 ± 0.41                    | 0.496        | 2.54 ± 0.35                    | 1.93 ± 0.32                    | 0.094        |
| 22 | Erysipelotrichaceae_UCG-003           | 2.07 ± 0.61                    | 1.39 ± 0.54                    | 0.071        | 1.84 ± 0.69                    | 1.44 ± 0.34                    | 0.701        |
| 23 | Escherichia-Shigella                  | 0.58 ± 0.42                    | 1.35 ± 0.87                    | 0.203        | 0.49 ± 0.24                    | 0.27 ± 0.19                    | 0.799        |
| 24 | Faecalibacterium                      | 5.49 ± 1.11                    | 7.22 ± 1.07                    | 0.233        | 6.54 ± 1.19                    | 8.05 ± 1.34                    | 0.078        |
| 25 | Fusicatenibacter                      | 2.22 ± 0.67                    | 2.12 ± 0.62                    | 0.551        | 1.61 ± 0.39                    | 1.98 ± 0.42                    | 0.349        |
| 26 | Holdemanella                          | 4.64 ± 1.31                    | 3.80 ± 1.08                    | 0.213        | 5.18 ± 1.76                    | 4.17 ± 1.25                    | 0.609        |
| 27 | Lachnospiraceae_ND3007_group          | 0.52 ± 0.08                    | 0.74 ± 0.17                    | 0.169        | 0.53 ± 0.11                    | 0.67 ± 0.10                    | 0.363        |
| 28 | Lachnospiraceae_NK4A136_group         | 0.60 ± 0.24                    | 1.53 ± 0.87                    | 0.776        | 0.61 ± 0.18                    | 0.56 ± 0.11                    | 0.943        |
| 29 | Lactobacillus                         | 0.15 ± 0.05                    | 1.09 ± 0.60                    | 0.139        | 0.70 ± 0.23                    | 0.90 ± 0.41                    | 0.878        |
| 30 | Megamonas                             | 0.52 ± 0.00                    | 1.23 ± 0.00                    | -            | 2.67 ± 0.87                    | 0.91 ± 0.65                    | 0.180        |
| 31 | Megasphaera                           | 0.61 ± 0.24                    | 0.49 ± 0.28                    | 1.000        | 0.49 ± 0.10                    | 0.54 ± 0.25                    | 1.000        |
| 32 | Prevotella_9                          | 0.63 ± 0.44                    | 0.44 ± 0.14                    | 0.674        | 1.06 ± 0.30                    | 1.13 ± 0.48                    | 0.678        |
| 33 | Roseburia                             | 1.57 ± 0.34                    | 2.27 ± 0.66                    | 0.394        | 1.49 ± 0.35                    | 1.34 ± 0.25                    | 0.267        |
| 34 | Ruminiclostridium_5                   | 0.97 ± 0.34                    | 0.53 ± 0.08                    | 1.000        | 0.54 ± 0.09                    | 0.53 ± 0.09                    | 0.948        |
| 35 | Ruminococcaceae_NK4A214_group         | 0.79 ± 0.19                    | 1.22 ± 0.24                    | 0.096        | 0.99 ± 0.24                    | 0.85 ± 0.20                    | 0.463        |
| 36 | Ruminococcaceae_UCG-002               | 2.16 ± 0.54                    | 3.07 ± 0.57                    | 0.078        | 2.18 ± 0.54                    | 2.28 ± 0.39                    | 0.569        |

**Table S11. Cont.**

| ID | OTU                     | POJ          |              |                 | MOJ          |              |                 |
|----|-------------------------|--------------|--------------|-----------------|--------------|--------------|-----------------|
|    |                         | T0           | T16          | <i>p</i> -value | T0           | T16          | <i>p</i> -value |
| 37 | Ruminococcaceae_UCG-005 | 1.15 ± 0.30  | 1.41 ± 0.31  | 0.109           | 1.14 ± 0.25  | 1.27 ± 0.22  | 0.523           |
| 38 | Ruminococcaceae_UCG-013 | 1.24 ± 0.37  | 0.85 ± 0.18  | 0.460           | 1.17 ± 0.42  | 0.96 ± 0.19  | 0.943           |
| 39 | Ruminococcaceae_UCG-014 | 2.84 ± 0.86  | 2.87 ± 1.09  | 0.878           | 2.07 ± 0.58  | 1.78 ± 0.43  | 0.424           |
| 40 | Ruminococcus_1          | 1.39 ± 0.34  | 1.76 ± 0.38  | 0.397           | 1.25 ± 0.25  | 1.48 ± 0.24  | 0.246           |
| 41 | Ruminococcus_2          | 6.99 ± 1.42  | 6.81 ± 1.73  | 0.730           | 6.67 ± 1.83  | 6.64 ± 1.95  | 0.831           |
| 42 | Streptococcus           | 1.57 ± 0.58  | 2.41 ± 1.40  | 0.683           | 2.14 ± 0.84  | 2.59 ± 1.48  | 0.687           |
| 43 | Subdoligranulum         | 7.50 ± 1.43  | 7.94 ± 1.20  | 0.826           | 8.39 ± 1.38  | 7.50 ± 1.22  | 0.407           |
| 44 | Succinivibrio           | 0.20 ± 0.11  | 1.22 ± 0.56  | 0.285           | 0.81 ± 0.79  | 0.43 ± 0.20  | 1.000           |
| 45 | Tyzzarella_3            | 0.46 ± 0.26  | 0.64 ± 0.43  | 1.000           | 0.51 ± 0.30  | 0.49 ± 0.24  | 0.655           |
|    | Uncultured              | 1.21 ± 0.28  | 1.62 ± 0.33  | 0.173           | 0.96 ± 0.20  | 1.03 ± 0.18  | 0.500           |
|    | Others                  | 11.66 ± 1.39 | 12.91 ± 0.92 | 0.173           | 10.11 ± 0.74 | 10.02 ± 0.65 | 0.711           |

OTU: Operational taxonomic unit. POJ: Pera orange juice. MOJ: Moro orange juice.

Results are expressed as the mean ± standard error (*n* = 16). The *p*-values were calculated using the Wilcoxon test. Values in bold and different superscript letters indicate statistical significance (*p* < 0.05) between T0 and T16.

**Table S12.** Relative abundance of significant gut microbiota OTUs (bacterial genera) in patients with different classes of obesity before (T0) and after (T16) Pera and Moro orange juice intake

| ID                | OTU                                   | Obese I class |             |         | Obese II class |             |         | Obese III class |              |         |
|-------------------|---------------------------------------|---------------|-------------|---------|----------------|-------------|---------|-----------------|--------------|---------|
|                   |                                       | T0            | T16         | p-value | T0             | T16         | p-value | T0              | T16          | p-value |
| Pera Orange juice |                                       |               |             |         |                |             |         |                 |              |         |
| 01                | [Eubacterium]_coprostanoligenes_group | 4.09 ± 0.74   | 3.90 ± 0.66 | 0.767   | 1.28 ± 0.60    | 2.08 ± 1.51 | 0.593   | 0.30 ± 0.08     | 0.42 ± 0.30  | 1.000   |
| 02                | [Eubacterium]_ruminantium_group       | 0.39 ± 0.15   | 0.63 ± 0.33 | 0.715   | 0.58 ± 0.00    | 2.98 ± 0.00 | -       | N.D.            | N.D.         | -       |
| 03                | [Ruminococcus]_gauvreauii_group       | 0.73 ± 0.20   | 0.70 ± 0.36 | 0.110   | 0.23 ± 0.16    | 0.44 ± 0.27 | 0.285   | 3.91 ± 0.00     | 3.09 ± 0.00  | -       |
| 04                | [Ruminococcus]_gnavus_group           | 0.17 ± 0.07   | 0.15 ± 0.09 | 0.180   | 0.11 ± 0.00    | 0.55 ± 0.00 | -       | 2.52 ± 1.31     | 0.15 ± 0.03  | 0.180   |
| 05                | [Ruminococcus]_torques_group          | 0.81 ± 0.23   | 0.72 ± 0.20 | 0.110   | 3.07 ± 1.51    | 1.31 ± 0.52 | 0.285   | 3.63 ± 2.10     | 1.89 ± 0.33  | 0.655   |
| 06                | Agathobacter                          | 5.04 ± 1.99   | 4.87 ± 1.49 | 0.767   | 16.23 ± 8.33   | 7.65 ± 5.43 | 0.285   | 23.38 ± 14.33   | 7.92 ± 3.40  | 0.109   |
| 07                | Akkermansia                           | 0.67 ± 0.26   | 1.12 ± 0.43 | 0.345   | 0.09 ± 0.00    | 0.02 ± 0.00 | -       | 0.08 ± 0.00     | 0.02 ± 0.00  | -       |
| 08                | Alistipes                             | 0.58 ± 0.20   | 0.67 ± 0.28 | 0.260   | 2.74 ± 2.40    | 2.38 ± 1.91 | 1.000   | 0.08 ± 0.04     | 0.53 ± 0.16  | 0.109   |
| 09                | Anaerostipes                          | 0.05 ± 0.02   | 1.21 ± 1.15 | 0.285   | 0.02 ± 0.00    | 0.02 ± 0.00 | -       | 6.82 ± 0.00     | 11.91 ± 0.00 | -       |
| 10                | Bacteroides                           | 2.51 ± 0.68   | 2.22 ± 0.55 | 0.859   | 10.75 ± 9.43   | 6.54 ± 4.40 | 1.000   | 2.74 ± 1.54     | 10 ± 4.60    | 0.109   |
| 11                | Bifidobacterium                       | 2.99 ± 0.92   | 2.60 ± 0.91 | 0.401   | 2.13 ± 0.00    | 0.73 ± 0.00 | -       | 8.53 ± 4.29     | 6.15 ± 3.88  | 1.000   |
| 12                | Blautia                               | 6.77 ± 1.81   | 5.37 ± 1.52 | 0.110   | 3.46 ± 0.86    | 1.84 ± 0.54 | 0.109   | 10.80 ± 1.91    | 7.71 ± 1.73  | 0.109   |
| 13                | Butyricicoccus                        | 0.48 ± 0.05   | 0.65 ± 0.18 | 0.515   | 0.46 ± 0.23    | 0.41 ± 0.14 | 0.593   | 1.57 ± 0.51     | 1.12 ± 0.39  | 0.593   |
| 14                | Butyrivibrio                          | 4.63 ± 2.27   | 2.18 ± 0.48 | 0.109   | 0.01 ± 0.00    | 0.17 ± 0.00 | -       | N.D.            | N.D.         | -       |
| 15                | Catenibacterium                       | 3.64 ± 2.75   | 1.91 ± 0.76 | 0.893   | 3.80 ± 0.86    | 4.75 ± 2.10 | 0.655   | 7.08 ± 0.00     | 13.28 ± 0.00 | -       |
| 16                | Christensenellaceae_R-7_group         | 5.33 ± 1.11   | 4.31 ± 0.99 | 0.594   | 2.35 ± 0.52    | 2.27 ± 1.16 | 1.000   | 0.14 ± 0.10     | 0.16 ± 0.07  | 0.593   |
| 17                | Collinsella                           | 1.20 ± 0.27   | 1.46 ± 0.37 | 0.441   | 1.05 ± 0.46    | 0.81 ± 0.51 | 0.180   | 1.65 ± 0.05     | 1.62 ± 0.36  | 0.655   |
| 18                | Coprococcus_2                         | 1.27 ± 0.65   | 1.82 ± 1.06 | 0.249   | 2.58 ± 0.00    | 2.58 ± 0.00 | -       | N.D.            | N.D.         | -       |
| 19                | Coprococcus_3                         | 1.69 ± 1.06   | 1.26 ± 0.64 | 0.515   | 0.67 ± 0.35    | 0.96 ± 0.52 | 0.285   | 0.94 ± 0.50     | 1.20 ± 0.25  | 0.180   |

**Table S12. Cont.**

| ID | OTU                           | Obese I class |             |                 | Obese II class |             |                 | Obese III class |             |                 |
|----|-------------------------------|---------------|-------------|-----------------|----------------|-------------|-----------------|-----------------|-------------|-----------------|
|    |                               | T0            | T16         | <i>p</i> -value | T0             | T16         | <i>p</i> -value | T0              | T16         | <i>p</i> -value |
| 20 | Dialister                     | 1.40 ± 0.52   | 2.41 ± 1.01 | 0.173           | N.D.           | N.D.        | -               | 1.88 ± 0.88     | 4.10 ± 0.68 | 0.180           |
| 21 | Dorea                         | 2.48 ± 0.69   | 2.20 ± 0.65 | 0.314           | 2.51 ± 1.78    | 1.71 ± 0.60 | 1.000           | 1.78 ± 0.29     | 1.60 ± 0.40 | 0.285           |
| 22 | Erysipelotrichaceae_UCG-003   | 1.77 ± 0.75   | 1.30 ± 0.64 | 0.263           | 0.73 ± 0.35    | 0.19 ± 0.13 | 0.180           | 4.63 ± 0.07     | 2.98 ± 1.93 | 0.655           |
| 23 | Escherichia-Shigella          | 0.25 ± 0.12   | 2.57 ± 1.64 | 0.080           | 0.01 ± 0.00    | 0.25 ± 0.18 | 0.180           | 1.49 ± 1.42     | 0.07 ± 0.04 | 0.285           |
| 24 | Faecalibacterium              | 6.87 ± 1.52   | 7.09 ± 1.31 | 0.953           | 3.42 ± 1.18    | 7.63 ± 3.10 | 0.109           | 3.41 ± 2.54     | 7.22 ± 3.08 | 0.285           |
| 25 | Fusicatenibacter              | 1.58 ± 0.25   | 1.54 ± 0.30 | 0.767           | 5.94 ± 4.63    | 4.80 ± 4.49 | 0.180           | 1.67 ± 0.45     | 2.04 ± 1.07 | 0.593           |
| 26 | Holdemanella                  | 4.04 ± 1.69   | 3.04 ± 1.07 | 0.249           | 5.76 ± 3.47    | 3.88 ± 3.38 | 0.109           | 4.77 ± 3.64     | 5.97 ± 2.51 | 0.180           |
| 27 | Lachnospiraceae_ND3007_group  | 0.58 ± 0.10   | 0.84 ± 0.22 | 0.176           | 0.50 ± 0.10    | 0.45 ± 0.30 | 0.655           | 0.13 ± 0.00     | 0.59 ± 0.00 | -               |
| 28 | Lachnospiraceae_NK4A136_group | 0.91 ± 0.37   | 0.62 ± 0.22 | 0.374           | 0.16 ± 0.12    | 5.70 ± 3.89 | 0.285           | 0.11 ± 0.03     | 0.11 ± 0.04 | 1.000           |
| 29 | Lactobacillus                 | 0.14 ± 0.05   | 1.13 ± 0.91 | 0.249           | 0.43 ± 0.00    | 0.29 ± 0.00 | -               | 0.02 ± 0.02     | 1.36 ± 0.38 | 0.180           |
| 30 | Megamonas                     | N.D.          | N.D.        | -               | N.D.           | N.D.        | -               | 0.52 ± 0.00     | 1.23 ± 0.00 | -               |
| 31 | Megasphaera                   | 0.80 ± 0.19   | 0.49 ± 0.39 | 0.593           | 0.03 ± 0.00    | 0.48 ± 0.00 | -               | N.D.            | N.D.        | -               |
| 32 | Prevotella_9                  | 0.70 ± 0.50   | 0.40 ± 0.15 | 1.000           | 0.11 ± 0.00    | 0.73 ± 0.00 | -               | N.D.            | N.D.        | -               |
| 33 | Roseburia                     | 1.34 ± 0.23   | 2.67 ± 1.03 | 0.139           | 0.67 ± 0.42    | 0.62 ± 0.35 | 0.593           | 3.17 ± 1.19     | 2.72 ± 0.98 | 0.593           |
| 34 | Ruminiclostridium_5           | 1.00 ± 0.53   | 0.45 ± 0.08 | 0.594           | 1.05 ± 0.64    | 0.63 ± 0.16 | 1.000           | 0.81 ± 0.43     | 0.69 ± 0.35 | 0.285           |
| 35 | Ruminococcaceae_NK4A214_group | 0.91 ± 0.26   | 1.38 ± 0.30 | 0.173           | 0.83 ± 0.38    | 1.42 ± 0.50 | 0.593           | 0.17 ± 0.16     | 0.21 ± 0.17 | 0.180           |
| 36 | Ruminococcaceae_UCG-002       | 3.04 ± 0.74   | 3.36 ± 0.46 | 0.260           | 1.51 ± 0.44    | 4.96 ± 1.73 | 0.285           | 0.20 ± 0.17     | 0.32 ± 0.14 | 0.593           |
| 37 | Ruminococcaceae_UCG-005       | 1.62 ± 0.38   | 1.59 ± 0.38 | 0.767           | 0.44 ± 0.15    | 1.69 ± 0.74 | 0.109           | 0.09 ± 0.07     | 0.21 ± 0.01 | 0.180           |
| 38 | Ruminococcaceae_UCG-013       | 0.69 ± 0.19   | 0.62 ± 0.20 | 0.859           | 1.07 ± 0.46    | 0.87 ± 0.19 | 1.000           | 3.07 ± 1.39     | 1.54 ± 0.51 | 0.285           |
| 39 | Ruminococcaceae_UCG-014       | 3.40 ± 0.98   | 3.58 ± 1.24 | 0.674           | 0.09 ± 0.00    | 0.01 ± 0.00 | -               | 1.12 ± 0.00     | 0.06 ± 0.00 | -               |
| 40 | Ruminococcus_1                | 1.69 ± 0.48   | 2.01 ± 0.48 | 0.374           | 1.21 ± 0.43    | 1.66 ± 1.03 | 1.000           | 0.29 ± 0.29     | 0.78 ± 0.77 | 0.180           |

Table S12. Cont.

| ID                | OTU                                   | Obese I class |              |         | Obese II class                  |                                |              | Obese III class                |                                |              |
|-------------------|---------------------------------------|---------------|--------------|---------|---------------------------------|--------------------------------|--------------|--------------------------------|--------------------------------|--------------|
|                   |                                       | T0            | T16          | p-value | T0                              | T16                            | p-value      | T0                             | T16                            | p-value      |
| 41                | Ruminococcus_2                        | 6.35 ± 2.01   | 5.05 ± 1.82  | 0.767   | 10.65 ± 0.29                    | 14.94 ± 2.60                   | 0.109        | 4.36 ± 3.13                    | 2.51 ± 1.10                    | 0.655        |
| 42                | Streptococcus                         | 0.78 ± 0.29   | 1.56 ± 0.52  | 0.093   | 2.89 ± 2.64                     | 0.16 ± 0.03                    | 0.285        | 2.33 ± 0.72                    | 6.94 ± 6.59                    | 1.000        |
| 43                | Subdoligranulum                       | 9.67 ± 1.78   | 8.75 ± 1.41  | 0.515   | 3.34 ± 2.09                     | 3.84 ± 1.52                    | 0.593        | 4.03 ± 0.04                    | 10.50 ± 4.15                   | 0.180        |
| 44                | Succinivibrio                         | 0.11 ± 0.07   | 1.69 ± 0.53  | 0.180   | 0.40 ± 0.00                     | 0.28 ± 0.00                    | -            | N.D.                           | N.D.                           | -            |
| 45                | Tyzzerella_3                          | 0.60 ± 0.39   | 0.22 ± 0.20  | 0.180   | N.D.                            | N.D.                           | -            | 0.18 ± 0.00                    | 1.47 ± 0.00                    | -            |
|                   | Uncultured                            | 1.51 ± 0.37   | 1.92 ± 0.46  | 0.314   | 1.11 ± 0.77                     | 1.94 ± 0.66                    | 0.109        | 0.44 ± 0.19                    | 0.42 ± 0.15                    | 1.000        |
|                   | Others                                | 12.76 ± 1.61  | 14.52 ± 1.01 | 0.173   | 11.94 ± 5.15                    | 11.76 ± 2.18                   | 1.000        | 8.06 ± 1.42                    | 9.21 ± 1.27                    | 0.285        |
| Moro orange juice |                                       |               |              |         |                                 |                                |              |                                |                                |              |
| 01                | [Eubacterium]_coprostanoligenes_group | 2.42 ± 0.57   | 3.11 ± 1.03  | 0.208   | 3.04 ± 1.42                     | 3.24 ± 1.13                    | 0.345        | 0.31 ± 0.14                    | 2.35 ± 1.42                    | 0.068        |
| 02                | [Eubacterium]_ruminantium_group       | 0.69 ± 0.21   | 0.61 ± 0.35  | 0.715   | 0.41 ± 0.23                     | 0.23 ± 0.05                    | 0.655        | N.D.                           | N.D.                           | -            |
| 03                | [Ruminococcus]_gauvreauii_group       | 0.78 ± 0.27   | 1.15 ± 0.56  | 0.866   | 0.37 ± 0.10                     | 0.62 ± 0.21                    | 0.138        | 1.97 ± 1.54                    | 1.81 ± 1.37                    | 0.593        |
| 04                | [Ruminococcus]_gnavus_group           | 0.23 ± 0.09   | 0.72 ± 0.57  | 0.593   | 0.19 ± 0.00                     | 0.06 ± 0.00                    | -            | 1.74 ± 1.51                    | 2.98 ± 2.85                    | 0.655        |
| 05                | [Ruminococcus]_torques_group          | 0.79 ± 0.28   | 1.11 ± 0.48  | 0.866   | 0.81 ± 0.16                     | 0.99 ± 0.27                    | 0.686        | 0.93 ± 0.47                    | 1.20 ± 0.83                    | 0.893        |
| 06                | Agathobacter                          | 8.31 ± 2.05   | 9.65 ± 2.67  | 0.401   | <b>17.29 ± 2.97<sup>a</sup></b> | <b>9.03 ± 2.74<sup>b</sup></b> | <b>0.043</b> | 16.38 ± 4.44                   | 11.01 ± 4.66                   | 0.138        |
| 07                | Akkermansia                           | 0.47 ± 0.24   | 0.83 ± 0.64  | 0.917   | 0.93 ± 0.70                     | 0.75 ± 0.15                    | 1.000        | 0.09 ± 0.00                    | 0.37 ± 0.00                    | -            |
| 08                | Alistipes                             | 0.56 ± 0.15   | 0.46 ± 0.14  | 0.208   | 0.75 ± 0.34                     | 0.72 ± 0.26                    | 0.893        | <b>0.14 ± 0.08<sup>b</sup></b> | <b>0.38 ± 0.15<sup>a</sup></b> | <b>0.043</b> |
| 09                | Anaerostipes                          | 0.14 ± 0.07   | 0.52 ± 0.41  | 0.273   | 0.05 ± 0.00                     | 0.12 ± 0.00                    |              | 0.50 ± 0.44                    | 0.20 ± 0.14                    | 0.465        |
| 10                | Bacteroides                           | 2.94 ± 0.67   | 3.65 ± 1.15  | 1.000   | 2.54 ± 1.26                     | 2.50 ± 1.07                    | 0.893        | <b>1.82 ± 0.92<sup>b</sup></b> | <b>5.14 ± 2.15<sup>a</sup></b> | <b>0.043</b> |
| 11                | Bifidobacterium                       | 1.57 ± 0.42   | 1.93 ± 0.83  | 0.866   | 2.83 ± 1.80                     | 2.10 ± 0.89                    | 0.715        | 10.30 ± 3.45                   | 7.31 ± 3.03                    | 0.138        |
| 12                | Blautia                               | 5.93 ± 1.65   | 5.66 ± 2.47  | 0.575   | 3.07 ± 1.23                     | 3.47 ± 1.08                    | 0.686        | 10.79 ± 2.33                   | 9.15 ± 2.60                    | 0.225        |
| 13                | Butyricicoccus                        | 1.03 ± 0.28   | 0.76 ± 0.15  | 0.401   | 0.37 ± 0.08 <sup>b</sup>        | 1.19 ± 0.37 <sup>a</sup>       | 0.043        | 1.49 ± 0.51                    | 1.25 ± 0.24                    | 0.893        |

**Table S12. Cont.**

| ID | OTU                           | Obese I class |             |                 | Obese II class |             |                 | Obese III class |             |                 |
|----|-------------------------------|---------------|-------------|-----------------|----------------|-------------|-----------------|-----------------|-------------|-----------------|
|    |                               | T0            | T16         | <i>p</i> -value | T0             | T16         | <i>p</i> -value | T0              | T16         | <i>p</i> -value |
| 14 | Butyrivibrio                  | 1.54 ± 1.46   | 1.53 ± 1.52 | 1.000           | 0.14 ± 0.12    | 0.36 ± 0.31 | 0.180           | N.D.            | N.D.        | -               |
| 15 | Catenibacterium               | 1.78 ± 1.20   | 3.92 ± 2.94 | 0.225           | 5.05 ± 2.04    | 6.14 ± 0.86 | 0.285           | 7.57 ± 3.47     | 4.83 ± 3.64 | 1.000           |
| 16 | Christensenellaceae_R-7_group | 3.59 ± 0.62   | 4.61 ± 1.32 | 0.889           | 2.04 ± 0.27    | 4.24 ± 2.12 | 0.345           | 2.10 ± 1.17     | 3.03 ± 2.61 | 1.000           |
| 17 | Collinsella                   | 2.33 ± 1.52   | 2.54 ± 1.59 | 0.161           | 0.69 ± 0.12    | 0.65 ± 0.09 | 0.715           | 4.55 ± 1.21     | 6.63 ± 4.71 | 1.000           |
| 18 | Coprococcus_2                 | 2.15 ± 0.91   | 1.50 ± 0.48 | 0.463           | 2.22 ± 0.92    | 1.94 ± 0.96 | 0.593           | 3.29 ± 0.00     | 9.33 ± 0.00 | -               |
| 19 | Coprococcus_3                 | 1.06 ± 0.26   | 1.58 ± 0.82 | 0.484           | 1.23 ± 0.39    | 1.43 ± 0.32 | 0.686           | 1.41 ± 0.51     | 1.58 ± 0.56 | 0.285           |
| 20 | Dialister                     | 2.58 ± 0.29   | 2.09 ± 0.62 | 0.715           | 2.95 ± 1.00    | 3.55 ± 0.61 | 0.593           | 4.91 ± 1.40     | 4.46 ± 1.18 | 0.180           |
| 21 | Dorea                         | 2.91 ± 0.67   | 2.25 ± 0.64 | 0.208           | 1.72 ± 0.37    | 1.78 ± 0.34 | 0.686           | 2.76 ± 0.44     | 1.56 ± 0.46 | 0.138           |
| 22 | Erysipelotrichaceae_UCG-003   | 2.45 ± 1.41   | 1.45 ± 0.55 | 0.600           | 1.10 ± 0.79    | 1.65 ± 0.88 | 0.109           | 1.49 ± 0.72     | 1.27 ± 0.57 | 0.715           |
| 23 | Escherichia-Shigella          | 0.26 ± 0.15   | 0.02 ± 0.01 | 0.225           | 0.40 ± 0.37    | 0.75 ± 0.61 | 0.109           | 1.17 ± 1.17     | 0.18 ± 0.18 | 0.655           |
| 24 | Faecalibacterium              | 8.05 ± 1.94   | 9.78 ± 2.42 | 0.208           | 7.66 ± 2.33    | 8.09 ± 1.58 | 0.500           | 3.00 ± 1.23     | 5.22 ± 2.30 | 0.138           |
| 25 | Fusicatenibacter              | 1.19 ± 0.25   | 2.23 ± 0.76 | 0.401           | 2.18 ± 1.33    | 1.44 ± 0.58 | 0.686           | 1.71 ± 0.53     | 2.12 ± 0.76 | 0.345           |
| 26 | Holdemanella                  | 3.47 ± 1.38   | 4.51 ± 2.74 | 0.753           | 6.45 ± 4.66    | 3.77 ± 1.21 | 0.686           | 6.14 ± 3.31     | 4.15 ± 2.41 | 0.068           |
| 27 | Lachnospiraceae_ND3007_group  | 0.62 ± 0.17   | 0.82 ± 0.11 | 0.600           | 0.62 ± 0.21    | 0.62 ± 0.20 | 0.893           | 0.20 ± 0.09     | 0.45 ± 0.27 | 0.109           |
| 28 | Lachnospiraceae_NK4A136_group | 0.79 ± 0.25   | 0.63 ± 0.23 | 0.398           | 0.79 ± 0.46    | 0.64 ± 0.17 | 0.893           | 0.17 ± 0.08     | 0.36 ± 0.14 | 0.345           |
| 29 | Lactobacillus                 | 0.74 ± 0.42   | 0.33 ± 0.15 | 0.686           | 0.53 ± 0.16    | 0.55 ± 0.52 | 0.655           | 0.75 ± 0.41     | 2.08 ± 1.17 | 0.593           |
| 30 | Megamonas                     | N.D.          | N.D.        | -               | 3.54 ± 0.00    | 0.26 ± 0.00 | -               | 1.81 ± 0.00     | 1.57 ± 0.00 | -               |
| 31 | Megasphaera                   | 0.50 ± 0.19   | 0.66 ± 0.55 | 0.655           | 0.48 ± 0.17    | 0.43 ± 0.23 | 0.655           | N.D.            | N.D.        | -               |
| 32 | Prevotella_9                  | 1.42 ± 0.35   | 1.43 ± 0.68 | 0.917           | 0.85 ± 0.00    | 1.38 ± 0.00 | -               | 0.08 ± 0.07     | 0.09 ± 0.02 | 0.655           |
| 33 | Roseburia                     | 1.43 ± 0.54   | 1.09 ± 0.25 | 0.674           | 1.93 ± 0.93    | 1.84 ± 0.70 | 0.500           | 1.14 ± 0.32     | 1.23 ± 0.40 | 0.500           |
| 34 | Ruminiclostridium_5           | 0.40 ± 0.12   | 0.54 ± 0.20 | 0.401           | 0.69 ± 0.10    | 0.50 ± 0.09 | 0.225           | 0.60 ± 0.25     | 0.54 ± 0.12 | 0.893           |

**Table S12. Cont.**

| ID | OTU                           | Obese I class                  |                                |                 | Obese II class |              |                 | Obese III class                |                                |                 |
|----|-------------------------------|--------------------------------|--------------------------------|-----------------|----------------|--------------|-----------------|--------------------------------|--------------------------------|-----------------|
|    |                               | T0                             | T16                            | <i>p</i> -value | T0             | T16          | <i>p</i> -value | T0                             | T16                            | <i>p</i> -value |
| 35 | Ruminococcaceae_NK4A214_group | 1.13 ± 0.42                    | 0.77 ± 0.24                    | 0.123           | 1.27 ± 0.40    | 0.80 ± 0.32  | 0.225           | 0.37 ± 0.28                    | 1.05 ± 0.68                    | 0.068           |
| 36 | Ruminococcaceae_UCG-002       | 2.36 ± 0.54                    | 2.05 ± 0.62                    | 0.575           | 3.04 ± 1.37    | 2.72 ± 0.63  | 0.893           | 0.29 ± 0.22                    | 2.16 ± 0.92                    | 0.109           |
| 37 | Ruminococcaceae_UCG-005       | 1.50 ± 0.41                    | 1.35 ± 0.31                    | 0.779           | 1.16 ± 0.44    | 1.20 ± 0.36  | 0.893           | 0.38 ± 0.20                    | 1.20 ± 0.68                    | 0.068           |
| 38 | Ruminococcaceae_UCG-013       | 1.36 ± 0.76                    | 0.93 ± 0.30                    | 0.575           | 0.71 ± 0.22    | 1.11 ± 0.38  | 0.138           | 1.38 ± 1.04                    | 0.83 ± 0.36                    | 0.465           |
| 39 | Ruminococcaceae_UCG-014       | <b>3.21 ± 0.71<sup>a</sup></b> | <b>1.75 ± 0.58<sup>b</sup></b> | <b>0.028</b>    | 0.99 ± 0.77    | 2.38 ± 1.09  | 0.109           | 0.25 ± 0.21                    | 0.96 ± 0.72                    | 0.180           |
| 40 | Ruminococcus_1                | 1.75 ± 0.38                    | 1.38 ± 0.29                    | 0.484           | 1.26 ± 0.32    | 1.90 ± 0.52  | 0.225           | 0.24 ± 0.13                    | 1.12 ± 0.59                    | 0.068           |
| 41 | Ruminococcus_2                | 9.25 ± 3.36                    | 9.04 ± 3.62                    | 0.779           | 6.48 ± 2.35    | 7.67 ± 2.23  | 0.500           | 1.77 ± 1.39                    | 0.53 ± 0.30                    | 0.715           |
| 42 | Streptococcus                 | 0.74 ± 0.27                    | 0.25 ± 0.11                    | 0.128           | 3.14 ± 2.80    | 5.24 ± 4.81  | 0.225           | 3.09 ± 0.71                    | 3.21 ± 1.69                    | 0.893           |
| 43 | Subdoligranulum               | 6.72 ± 1.37                    | 5.03 ± 1.08                    | 0.093           | 6.22 ± 1.35    | 7.85 ± 2.49  | 0.345           | 14.46 ± 3.93                   | 11.99 ± 2.63                   | 0.715           |
| 44 | Succinivibrio                 | 1.21 ± 1.18                    | 0.60 ± 0.19                    | 0.655           | 0.01 ± 0.00    | 0.09 ± 0.00  | -               | N.D.                           | N.D.                           | -               |
| 45 | Tyzzereella_3                 | 0.80 ± 0.00                    | 0.73 ± 0.00                    | -               | 0.21 ± 0.00    | 0.26 ± 0.00  | -               | N.D.                           | N.D.                           | -               |
|    | Uncultured                    | 1.14 ± 0.30                    | 0.98 ± 0.26                    | 0.401           | 1.27 ± 0.46    | 1.51 ± 0.38  | 0.500           | <b>0.37 ± 0.13<sup>b</sup></b> | <b>0.63 ± 0.20<sup>a</sup></b> | <b>0.043</b>    |
|    | Others                        | 12.59 ± 0.51                   | 11.14 ± 0.98                   | 0.123           | 9.19 ± 1.36    | 10.19 ± 1.20 | 0.500           | 7.04 ± 0.85                    | 8.06 ± 0.96                    | 0.138           |

OTU: Operational taxonomic unit. Results are expressed as the mean ± standard error. The *p*-values were calculated using the Wilcoxon test.

Values in bold and different superscript letters indicate statistical significance (*p* < 0.05) between T0 and T16 for each class of obesity.



**Table S13.** Effect of Pera (POJ) and Moro orange juice (MOJ) intake on the fecal short-chain fatty acids

|             | POJ                            |                                |                 | MOJ         |             |                 |
|-------------|--------------------------------|--------------------------------|-----------------|-------------|-------------|-----------------|
|             | T0                             | T16                            | <i>p</i> -value | T0          | T16         | <i>p</i> -value |
| Acetate     | <b>1.68 ± 0.12<sup>a</sup></b> | <b>1.05 ± 0.22<sup>b</sup></b> | <b>0.022</b>    | 0.44 ± 0.05 | 0.63 ± 0.14 | 0.157           |
| Propionate  | 1.36 ± 0.06                    | 1.13 ± 0.11                    | 0.287           | 0.59 ± 0.07 | 0.45 ± 0.08 | 0.995           |
| Butyrate    | 1.65 ± 0.07                    | 1.51 ± 0.09                    | 1.000           | 0.73 ± 0.01 | 0.70 ± 0.08 | 0.815           |
| Isobutyrate | 1.40 ± 0.05                    | 1.14 ± 0.10                    | 0.169           | 0.67 ± 0.01 | 0.49 ± 0.26 | 0.833           |

Results are expressed as the mean ± standard error. The *p*-values were calculated using the Wilcoxon test. Values in bold and different superscript letters indicate statistical significance (*p* < 0.05) between T0 and T16.
